# Supplementary material for: Isolation and characterization of the novel mycobacteriophage SLM01
Source: Research Square preprint supplement (doi:10.21203/rs.3.rs-8655216/v1), 2026-02-13
Supplement: Supplementary file 1 [file fa6f2a1d6e40bd7bdc4a8a31.docx]

Appendix A. Supplementary data

**Isolation and characterization of the novel mycobacteriophage****SLM01**

Lizhu Shena,1, Chunyang Lia,1, Qiumeng Lia, Keshan Lind, Xinrui Lia, Yufei Yanga, Yujiao Wua, Lijuan Guoa,b,c*, Hui Lia,b,c*

aSchool of Laboratory Medicine, Chengdu Medical College, Chengdu 610041, China

bSichuan Provincial Engineering Laboratory for Prevention and Control Technology of Veterinary Drug Residue in Animal-Origin Food, Chengdu Medical College, Chengdu 610041, China

cClinical IVD Joint Research Center of Chengdu Medical College-Maccura Biotechnology, Chengdu 610041, China

dDepartment of Medical Laboratory, Chengdu Seventh People's Hospital (Affiliated Cancer Hospital of Chengdu Medical College), Chengdu, Sichuan, China

* Correspondence author:Hui Li, E-mail address: huili@cmc.edu.cn

1 These authors contributed equally to this work


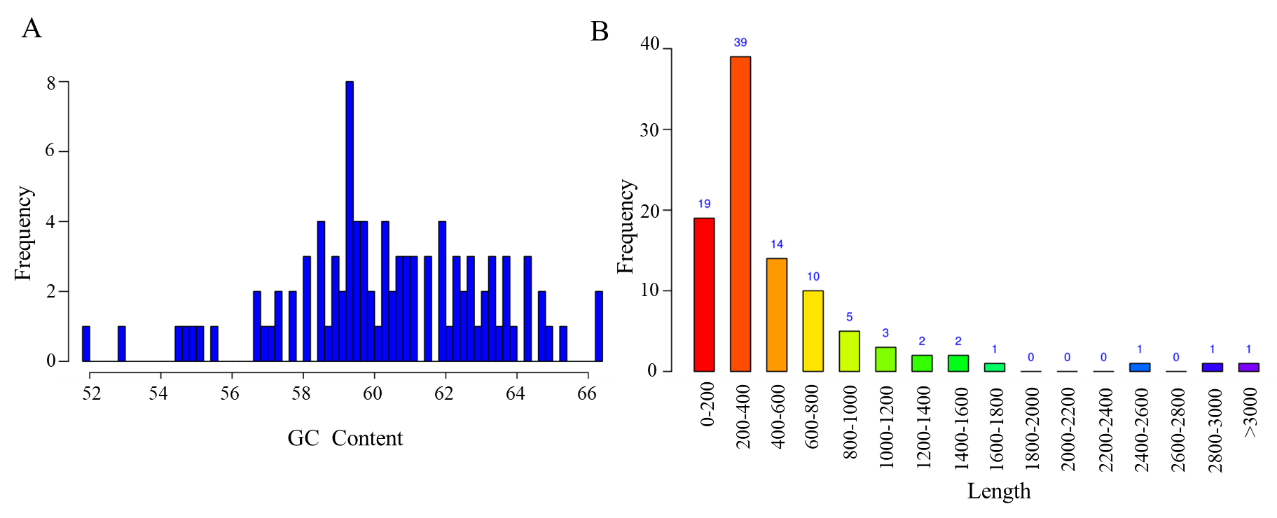


Fig S1. The genomic features of SLM01. (A) The average GC content is 61.05% in SLM01 genome. (B) The gene length distribution in SLM01 genome.

Table S1. The predicted open reading frames(ORFs) of SLM01

| **ORF** | **product** | **accession** | **evalue** | **start** | **stop** | **MW(kDa)** | **F/Ra** |
| --- | --- | --- | --- | --- | --- | --- | --- |
| 01 | HNH endonuclease | NP_817974.1 | 1.00E-70 | 88 | 420 | 12.4 | R |
| 02 | terminase small subunit | YP_008409539.1 | 4.00E-48 | 487 | 741 | 9.4 | R |
| 03 | terminase large subunit | YP_009963818.1 | 0 | 713 | 2233 | 55.7 | R |
| 04 | portal protein | NP_817977.1 | 0 | 2230 | 3654 | 52.3 | R |
| 05 | head maturation protease | YP_009963820.1 | 2.00E-144 | 3635 | 4279 | 23.5 | R |
| 06 | head scaffolding protein | YP_008410678.1 | 7.00E-124 | 4356 | 4904 | 19.6 | R |
| 07 | major capsid protein | NP_817980.1 | 0 | 4927 | 5862 | 32.7 | R |
| 08 | hypothetical protein | YP_008410680.1 | 1.00E-23 | 5874 | 6017 | 5.0 | R |
| 09 | head-tail adaptor | YP_008410681.1 | 8.00E-107 | 6035 | 6490 | 15.8 | R |
| 10 | head-tail adaptor | NP_817983.1 | 2.00E-77 | 6487 | 6840 | 12.8 | R |
| 11 | hypothetical protein | NP_817984.1 | 8.00E-34 | 6837 | 7013 | 6.4 | R |
| 12 | neck protein | NP_817985.1 | 2.00E-56 | 6997 | 7269 | 9.7 | R |
| 13 | head to tail connector protein | QXG07400.1 | 7.00E-92 | 7262 | 7666 | 14.9 | R |
| 14 | major tail protein | NP_817987.1 | 5.00E-143 | 7728 | 8321 | 21.6 | R |
| 15 | tail assembly chaperone | QXG07398.1 | 1.00E-140 | 8418 | 9029 | 22.3 | R |
| 16 | tail length tape measure protein | NP_817990.1 | 0.00E+00 | 9312 | 12863 | 121.5 | R |
| 17 | minor tail protein | NP_817991.1 | 0 | 12860 | 13789 | 34.8 | R |
| 18 | minor tail protein | NP_817992.1 | 0 | 13791 | 15455 | 62.7 | R |
| 19 | minor tail protein | NP_817993.1 | 6.00E-82 | 15455 | 15820 | 14.0 | R |
| 20 | minor tail protein | NP_817994.1 | 9.00E-72 | 15817 | 16140 | 12.1 | R |
| 21 | minor tail protein | YP_009963837.1 | 1.00E-66 | 16137 | 16445 | 10.8 | R |
| 22 | minor tail protein | YP_009963838.1 | 6.00E-168 | 16442 | 17143 | 25.3 | R |
| 23 | minor tail protein | YP_009963839.1 | 0 | 17140 | 19689 | 89.0 | R |
| 24 | minor tail protein | YP_009963840.1 | 0 | 19686 | 22517 | 96.0 | R |
| 25 | minor tail protein | XCP73528.1 | 0 | 22514 | 23461 | 31.0 | R |
| 26 | hypothetical protein | YP_009963842.1 | 7.00E-81 | 23552 | 23965 | 13.8 | R |
| 27 | HNH endonuclease | YP_009963843.1 | 6.00E-163 | 24029 | 24697 | 25.8 | R |
| 28 | [DNA binding protein](https://blast.ncbi.nlm.nih.gov/Blast.cgi) | [WNM68417.1](https://www.ncbi.nlm.nih.gov/protein/WNM68417.1?report=genbank&log$=prottop&blast_rank=1&RID=AUPY1MKR013) | 6.00E-40 | 24698 | 24919 | 8.5 | F |
| 29 | hypothetical protein | YP_008408985.1 | 2.00E-59 | 25019 | 25303 | 9.7 | R |
| 30 | hypothetical protein | NP_817368.1 | 3.00E-23 | 25453 | 25593 | 4.9 | R |
| 31 | hypothetical protein | UVK60474.1 | 7.00E-42 | 25659 | 25892 | 8.2 | R |
| 32 | lysin A | UVK60475.1 | 0 | 25889 | 27160 | 47.2 | R |
| 33 | lysin B | AVO24486.1 | 0 | 27160 | 28161 | 36.7 | R |
| 34 | holin | YP_008409097.1 | 3.00E-43 | 28175 | 28408 | 7.7 | R |
| 35 | minor tail protein | YP_009007500.1 | 3.00E-80 | 28405 | 28779 | 14.2 | R |
| 36 | hypothetical protein | YP_009954721.1 | 2.00E-48 | 28803 | 29036 | 8.7 | R |
| 37 | DnaQ-like DNA polymerase III subunit | [NP_817375.1](https://www.ncbi.nlm.nih.gov/protein/NP_817375.1?report=genbank&log$=prottop&blast_rank=1&RID=AURAN3VC015) | 0 | 29023 | 29844 | 31.1 | R |
| 38 | hypothetical protein | YP_009958577.1 | 1.00E-50 | 29901 | 30152 | 8.9 | R |
| 39 | hypothetical protein | NP_817377.2 | 8.00E-25 | 30145 | 30237 | 3.3 | R |
| 40 | hypothetical protein | YP_009954517.1 | 4.00E-39 | 30385 | 30585 | 7.5 | R |
| 41 | hypothetical protein | QHB38440.1 | 9.00E-40 | 30711 | 30932 | 7.9 | F |
| 42 | hypothetical protein | YP_001469271.1 | 8.00E-04 | 30920 | 31036 | 4.1 | F |
| 43 | hypothetical protein | YP_009958579.1 | 2.00E-80 | 31051 | 31410 | 23.5 | F |
| 44 | hypothetical protein | YP_009957553.1 | 2.00E-30 | 31392 | 31559 | 5.7 | F |
| 45 | hypothetical protein | YP_009957135.1 | 1.00E-47 | 31559 | 31795 | 8.5 | F |
| 46 | hypothetical protein | YP_009637186.1 | 8.00E-31 | 31841 | 32008 | 6.4 | F |
| 47 | hypothetical protein | QXG07420.1 | 2.00E-32 | 32008 | 32178 | 6.7 | F |
| 48 | tyrosine integrase | NP_817384.1 | 0 | 32527 | 33840 | 49.5 | R |
| 49 | hypothetical protein | YP_009956923.1 | 1.00E-89 | 33903 | 34316 | 14.4 | F |
| 50 | transcriptional repressor | YP_009954940.1 | 5.00E-174 | 34618 | 35358 | 27.6 | F |
| 51 | anti-repressor Ant | YP_009638405.1 | 0 | 35647 | 36651 | 37.6 | R |
| 52 | hypothetical protein | YP_009187208.1 | 4.00E-43 | 36648 | 36863 | 7.9 | R |
| 53 | hypothetical protein | YP_009957145.1 | 3.00E-39 | 36949 | 37146 | 7.5 | R |
| 54 | hypothetical protein | YP_009955060.1 | 4.00E-52 | 37190 | 37546 | 13.5 | R |
| 55 | hypothetical protein | YP_009189776.1 | 2.00E-35 | 37543 | 37731 | 7.0 | R |
| 56 | hypothetical protein | UJE15599.1 | 1.00E-97 | 37728 | 38303 | 20.5 | R |
| 57 | hypothetical protein | YP_009957041.1 | 2.00E-170 | 38340 | 39092 | 26.0 | R |
| 58 | hypothetical protein | YP_009956615.1 | 5.00E-60 | 39173 | 39454 | 10.7 | R |
| 59 | gp53 | [YP_002241738.1](https://www.ncbi.nlm.nih.gov/protein/YP_002241738.1?report=genbank&log$=prottop&blast_rank=1&RID=AURAVAYV013) | 2.00E-34 | 39451 | 39639 | 6.7 | R |
| 60 | hypothetical protein | YP_009954848.1 | 6.00E-72 | 39643 | 39978 | 11.7 | R |
| 61 | WhiB transcriptional factor | YP_009961052.1 | 8.00E-117 | 39978 | 40472 | 18.6 | R |
| 62 | hypothetical protein | YP_002241636.1 | 1.00E-111 | 40469 | 40954 | 18.3 | R |
| 63 | WhiB | [YP_009209613.1](https://www.ncbi.nlm.nih.gov/protein/YP_009209613.1?report=genbank&log$=prottop&blast_rank=1&RID=AURAWD1P013) | 1.00E-60 | 40951 | 41229 | 10.3 | R |
| 64 | DNA binding protein | YP_009198167.1 | 6.00E-82 | 41226 | 41591 | 13.6 | R |
| 65 | hypothetical protein | YP_002014282.1 | 2.00E-28 | 41591 | 41746 | 6.2 | R |
| 66 | hypothetical protein | XCP73563.1 | 3.00E-43 | 41746 | 41976 | 8.2 | R |
| 67 | hypothetical protein | YP_009198170.1 | 2.00E-53 | 41973 | 42239 | 10.4 | R |
| 68 | DNA methyltransferase | YP_008059924.1 | 2.00E-84 | 42232 | 42606 | 14.0 | R |
| 69 | single strand annealing protein | YP_009956409.1 | 8.00E-133 | 42603 | 43181 | 20.6 | R |
| 70 | HNH endonuclease | YP_009613985.1 | 1.00E-82 | 43178 | 43540 | 13.8 | R |
| 71 | hypothetical protein | QAY10995.1 | 6.00E-49 | 43537 | 43767 | 8.8 | R |
| 72 | hypothetical protein | QBJ00893.1 | 3.00E-21 | 43796 | 44053 | 8.7 | F |
| 73 | endonuclease | YP_009955081.1 | 4.00E-135 | 44198 | 44758 | 21.3 | R |
| 74 | replication initiation protein | YP_009856256.1 | 0 | 44758 | 45720 | 34.6 | R |
| 75 | hypothetical protein | YP_009187238.1 | 7.00E-40 | 45977 | 46180 | 7.9 | R |
| 76 | hypothetical protein | QYC54872.1 | 2.00E-38 | 46126 | 46377 | 9.0 | R |
| 77 | hypothetical protein | YP_002014511.1 | 1.00E-43 | 46361 | 46732 | 13.1 | R |
| 78 | hypothetical protein | QQM15233.1 | 9.00E-26 | 46729 | 47208 | 17.9 | R |
| 79 | hypothetical protein | XAL85138.1 | 6.00E-09 | 47205 | 47468 | 9.9 | R |
| 80 | hypothetical protein | XJP08545.1 | 9.00E-30 | 47437 | 47742 | 11.2 | R |
| 81 | hypothetical protein | QOC55821.1 | 1.00E-18 | 47739 | 47867 | 4.9 | R |
| 82 | [hypothetical protein](https://blast.ncbi.nlm.nih.gov/Blast.cgi) | [YP_009961390.1](https://www.ncbi.nlm.nih.gov/protein/YP_009961390.1?report=genbank&log$=prottop&blast_rank=1&RID=8V9KJC26013) | 2E-70 | 47864 | 48055 | 7.1 | R |
| 83 | [hypothetical protein](https://blast.ncbi.nlm.nih.gov/Blast.cgi) | [QEQ94485.1](https://www.ncbi.nlm.nih.gov/protein/QEQ94485.1?report=genbank&log$=prottop&blast_rank=2&RID=8VBB7760015) | 9E-32 | 48052 | 48240 | 7.4 | R |
| 84 | hypothetical protein | YP_009211257.1 | 3E-33 | 48237 | 48416 | 6.6 | R |
| 85 | hypothetical protein | YP_009961390.1 | 2.00E-70 | 48550 | 48867 | 11.8 | R |
| 86 | gp95 | [YP_002241882.1](https://www.ncbi.nlm.nih.gov/protein/YP_002241882.1?report=genbank&log$=prottop&blast_rank=1&RID=AURB1GSX013) | 2.00E-32 | 48864 | 49043 | 6.6 | R |
| 87 | hypothetical protein | YP_001994699.1 | 1.00E-105 | 49043 | 49489 | 17.0 | R |
| 88 | hypothetical protein | YP_008410658.1 | 2.00E-47 | 49602 | 49838 | 8.5 | R |
| 89 | hypothetical protein | YP_009959861.1 | 7.00E-55 | 49831 | 50100 | 10.2 | R |
| 90 | hypothetical protein | YP_008409053.1 | 3.00E-164 | 50097 | 50783 | 25.9 | R |
| 91 | putative HtrL_YibB protein | YP_008059909.1 | 1.00E-146 | 50780 | 51382 | 22.4 | R |
| 92 | putative GIY-YIG nuclease | YP_008059908.1 | 8.00E-30 | 51570 | 51734 | 6.1 | R |
| 93 | hypothetical protein | NP_818071.1 | 7.00E-29 | 51740 | 51898 | 5.6 | R |
| 94 | hypothetical protein | YP_009841132.1 | 3.00E-51 | 51895 | 52152 | 10.3 | R |
| 95 | hypothetical protein | YP_008410776.1 | 9.00E-103 | 52149 | 52619 | 16.5 | F |
| 96 | glycosyltransferase | YP_009963915.1 | 0 | 52671 | 53837 | 43.9 | R |
| 97 | galactosyl transferase | YP_009963916.1 | 1.00E-159 | 53834 | 54532 | 25.8 | R |
| 98 | glucosyltransferase | YP_009963917.1 | 2.00E-127 | 54529 | 55131 | 22.2 | R |
